# Supplementary material
Source: PubMed Central journal article supplement (PMC6441958)
Supplement: NIHMS1013160-supplement-1.pdf [file NIHMS1013160-supplement-1.pdf]

Supplementary Table 1.  
*Coded Effect Size Direction by Negative Affectivity Outcome.*

| Negative Affectivity Outcome                                                                  | Positive Effect Direction | <i>k</i> | Study                                                                    |
|-----------------------------------------------------------------------------------------------|---------------------------|----------|--------------------------------------------------------------------------|
| Affect Scale Negative                                                                         | –                         | 1        | (Arch & Craske, 2006)                                                    |
| Aggression (Computerized Task)                                                                | –                         | 1        | (Heppner et al., 2008)                                                   |
| Anger                                                                                         | –                         | 1        | (Ortner & Zelazo, 2014)                                                  |
| Anger Rumination Scale                                                                        | –                         | 1        | (Long & Christian, 2015)                                                 |
| Attitude Towards Negative Experiences Scale – Negative Attitudes Towards Negative Experiences | –                         | 1        | (Singer & Dobson, 2007)                                                  |
| Average Post Event Processing Degree                                                          | –                         | 1        | (Shikatani, Antony, Kuo, & Cassin, 2014)                                 |
| Average Post Event Processing Distress                                                        | –                         | 1        | (Shikatani et al., 2014)                                                 |
| BDI-II                                                                                        | –                         | 1        | (Luethcke et al., 2011)                                                  |
| Body Image Avoidance Questionnaire                                                            | –                         | 1        | (Luethcke et al., 2011)                                                  |
| Brief Core Schema Scale (BCSS) – Negative Other                                               | –                         | 1        | (Ellett, Freeman, & Garety, 2008)                                        |
| Brief Core Schema Scale (BCSS) – Negative Self                                                | –                         | 1        | (Ellett et al., 2008)                                                    |
| Brief Fear of Negative Evaluation Scale                                                       | –                         | 1        | (Ellett et al., 2008)                                                    |
| Brief Mood Inspection Scale                                                                   | –                         | 1        | (Alberts & Thewissen, 2011)                                              |
| Center for Epidemiologic Studies Depression Scale                                             | –                         | 1        | (Zeidan, Johnson, Diamond, David, & Goolkasian, 2010a <sup>1</sup> )     |
| DASS-21                                                                                       | –                         | 3        | (Nosen & Woody, 2013 <sup>2</sup> ; Rogojanski, Vettese, & Antony, 2010) |
| DES – Anger                                                                                   | –                         | 1        | (Reynolds, Lin, Zhou, & Consedine, 2015)                                 |
| DES - Contempt                                                                                | –                         | 1        | (Reynolds et al., 2015)                                                  |
| DES - Disgust                                                                                 | –                         | 1        | (Reynolds et al., 2015)                                                  |
| DES - Fear                                                                                    | –                         | 1        | (Reynolds et al., 2015)                                                  |
| DES – Guilt                                                                                   | –                         | 1        | (Reynolds et al., 2015)                                                  |
| DES - Sad                                                                                     | –                         | 1        | (Reynolds et al., 2015)                                                  |
| DES - Shame                                                                                   | –                         | 1        | (Reynolds et al., 2015)                                                  |
| Difficulties in Emotion Regulation Scale                                                      | –                         | 1        | (Watford & Stafford, 2015)                                               |
| DERS – Aware                                                                                  | –                         | 1        | (Erisman & Roemer, 2010)                                                 |
| DERS – Clarity                                                                                | –                         | 1        | (Erisman & Roemer, 2010)                                                 |
| DERS - State                                                                                  | –                         | 2        | (Erisman & Roemer, 2010; Watford & Stafford, 2015)                       |
| Distress Tolerance (Paced Auditory Serial Addition Task – Computerized Version)               | +                         | 1        | (Sauer & Baer, 2012)                                                     |

<sup>1</sup>No data reported; an F statistic of 0.01 was assumed, which coded for no effect in our database.

<sup>2</sup>No data reported; an F statistic of 0.01 was assumed, which coded for no effect in our database.

|                                                      |   |                 |                                                                                                                                                                                                                                                                                                                                                                                                                                                                                                                                                                               |
|------------------------------------------------------|---|-----------------|-------------------------------------------------------------------------------------------------------------------------------------------------------------------------------------------------------------------------------------------------------------------------------------------------------------------------------------------------------------------------------------------------------------------------------------------------------------------------------------------------------------------------------------------------------------------------------|
| DDSQ – Thinking Content                              | – | 1               | (Banks et al., 2015)                                                                                                                                                                                                                                                                                                                                                                                                                                                                                                                                                          |
|                                                      |   |                 | (Banks et al., 2015)                                                                                                                                                                                                                                                                                                                                                                                                                                                                                                                                                          |
| DDSQ – Thinking Style - Concentration                | – | 1               | (Banks et al., 2015)                                                                                                                                                                                                                                                                                                                                                                                                                                                                                                                                                          |
| DDSQ – Thinking Style – Control and Confidence       | – | 1               | (Banks et al., 2015)                                                                                                                                                                                                                                                                                                                                                                                                                                                                                                                                                          |
| DDSQ – Thinking Style – Self-Esteem                  | – | 1               | (Banks et al., 2015)                                                                                                                                                                                                                                                                                                                                                                                                                                                                                                                                                          |
| DDSQ – Thinking Style – Self-Focused                 | – | 1               | (Banks et al., 2015)                                                                                                                                                                                                                                                                                                                                                                                                                                                                                                                                                          |
| Dysfunctional Attitudes Scale                        | – | 1               | (Kuehner, Huffziger, & Liebsch, 2009)                                                                                                                                                                                                                                                                                                                                                                                                                                                                                                                                         |
| EDE-Q Shape and Weight Concern Subscale              | – | 1               | (Luethcke et al., 2011)                                                                                                                                                                                                                                                                                                                                                                                                                                                                                                                                                       |
| Emotional Exhaustion (Maslach Burnout Inventory)     | – | 1               | (Hülshager, Alberts, Feinholdt, & Lang, 2013)                                                                                                                                                                                                                                                                                                                                                                                                                                                                                                                                 |
| Future Events Scale – Pessimism                      | – | 1               | (Kiken & Shook, 2011)                                                                                                                                                                                                                                                                                                                                                                                                                                                                                                                                                         |
| Goldberg Scale for Neuroticism                       | – | 1               | (Zabelina, 2011 <sup>3</sup> )                                                                                                                                                                                                                                                                                                                                                                                                                                                                                                                                                |
| Impact of Events Scale                               | – | 1               | (Ramos Díaz, Jiménez Jiménez, & Lopes, 2014)                                                                                                                                                                                                                                                                                                                                                                                                                                                                                                                                  |
| Intrusive Thoughts                                   | – | 1               | (Wells & Roussis, 2014)                                                                                                                                                                                                                                                                                                                                                                                                                                                                                                                                                       |
| Irritability                                         | – | 1               | (Marchiori & Papies, 2014)                                                                                                                                                                                                                                                                                                                                                                                                                                                                                                                                                    |
| Linguistic Inquiry and Word Count – Anger            | – | 1               | (Ortner & Zelazo, 2014)                                                                                                                                                                                                                                                                                                                                                                                                                                                                                                                                                       |
| Linguistic Inquiry and Word Count – Negative Emotion | – | 1               | (Ortner & Zelazo, 2014)                                                                                                                                                                                                                                                                                                                                                                                                                                                                                                                                                       |
| MPSS – Depression                                    | – | 1               | (Cropley et al., 2007 <sup>4</sup> )                                                                                                                                                                                                                                                                                                                                                                                                                                                                                                                                          |
| MPSS – Irritability                                  | – | 2               | (Cropley et al., 2007; Ussher et al., 2009)                                                                                                                                                                                                                                                                                                                                                                                                                                                                                                                                   |
| MPSS – Stress                                        | – | 2               | (Cropley et al., 2007; Ussher et al., 2009)                                                                                                                                                                                                                                                                                                                                                                                                                                                                                                                                   |
| MPSS – Tension                                       | – | 2               | (Cropley et al., 2007; Ussher et al., 2009)                                                                                                                                                                                                                                                                                                                                                                                                                                                                                                                                   |
| Negative Affect (Affect Circumplex)                  | – | 1               | (Murphy & MacKillop, 2014)                                                                                                                                                                                                                                                                                                                                                                                                                                                                                                                                                    |
|                                                      |   |                 | (Alberts & Thewissen, 2011)                                                                                                                                                                                                                                                                                                                                                                                                                                                                                                                                                   |
| Negative Memory Recall                               | – | 1               |                                                                                                                                                                                                                                                                                                                                                                                                                                                                                                                                                                               |
| Negative Thoughts                                    | – | 1               | (Broderick, 2005)                                                                                                                                                                                                                                                                                                                                                                                                                                                                                                                                                             |
| Pain Distress                                        | – | 1               | (Liu, Wang, Chang, Chen, & Si, 2013)                                                                                                                                                                                                                                                                                                                                                                                                                                                                                                                                          |
| Pain Experience Questionnaire: Affective Pain        | – | 1               | (Prins, Decuyper, & Van Damme, 2014)                                                                                                                                                                                                                                                                                                                                                                                                                                                                                                                                          |
| Pain Experience Questionnaire: General Anxiety       | – | 1               | (Prins et al., 2014)                                                                                                                                                                                                                                                                                                                                                                                                                                                                                                                                                          |
| PANAS – NA (State Version)                           | – | 28 <sup>5</sup> | (Adams et al., 2013; Ainsworth et al., 2015; Arch & Craske, 2006; Atkinson & Wade, 2012; Banks, Welhaf, & Srouf, 2015; Bowen & Marlatt, 2009; Broderick, 2005; Cassin & Rector, 2011; Creswell, Pacilio, Lindsay, & Brown, 2014; Erisman & Roemer, 2010; Hong, Lishner, & Han, 2012; Huffziger & Kuehner, 2009; Kiken & Shook, 2011; Kuehner et al., 2009; Laurent, Laurent, Nelson, Wright, & Sanchez, 2014; McClintock & Anderson, 2013; Ramos Díaz et al., 2014; Ramsey & Jones, 2015; Rogojanski et al., 2010; Shikatani et al., 2014; Verplanken & Fisher, 2013; Villa & |

<sup>3</sup>No data reported; an F statistic of 0.01 was assumed, which coded for no effect in our database.

<sup>4</sup>No data reported for this study for any MPSS measures; an F statistic of 0.01 was assumed, which coded for no effect in our database.

|                                                                 |   |    |                                                                                                                                                                                                                                                                                                                                                                                         |
|-----------------------------------------------------------------|---|----|-----------------------------------------------------------------------------------------------------------------------------------------------------------------------------------------------------------------------------------------------------------------------------------------------------------------------------------------------------------------------------------------|
| PANAS – NA (Trait Version)                                      | – | 1  | Hilt, 2014; Vinci et al., 2014; Watford & Stafford, 2015; Yusainy & Lawrence, 2015) (Ortner & Zelazo, 2014)                                                                                                                                                                                                                                                                             |
| PANAS-X – Anger                                                 | – | 1  | (Sauer & Baer, 2012)                                                                                                                                                                                                                                                                                                                                                                    |
| Patient Health Questionnaire for Depression and Anxiety (PHQ-4) | – | 1  | (Cavanagh et al., 2013)                                                                                                                                                                                                                                                                                                                                                                 |
| Patient Health Questionnaire (PHQ-15)                           | – | 1  | (Mirams, Poliakoff, Brown, & Lloyd, 2013)                                                                                                                                                                                                                                                                                                                                               |
| Perceived Stress Scale                                          | – | 1  | (Cavanagh et al., 2013)                                                                                                                                                                                                                                                                                                                                                                 |
| Post Event Processing – Degree                                  | – | 1  | (Shikatani et al., 2014)                                                                                                                                                                                                                                                                                                                                                                |
| Post Event Processing – Distress                                | – | 1  | (Shikatani et al., 2014)                                                                                                                                                                                                                                                                                                                                                                |
| POMS                                                            | – | 3  | (Johnson, Gur, David, & Currier, 2013; Zeidan, Johnson, Diamond, et al., 2010a; Zeidan, Johnson, Gordon, et al., 2010b)                                                                                                                                                                                                                                                                 |
| POMS – Anger                                                    | – | 3  | (Johnson et al., 2013; Zeidan, Johnson, Diamond, et al., 2010a; Zeidan, Johnson, Gordon, et al., 2010b)                                                                                                                                                                                                                                                                                 |
| POMS – Depression                                               | – | 3  | (Johnson et al., 2013; Zeidan, Johnson, Diamond, et al., 2010a; Zeidan, Johnson, Gordon, et al., 2010b)                                                                                                                                                                                                                                                                                 |
| POMS – Tension                                                  | – | 3  | (Johnson et al., 2013; Zeidan, Johnson, Diamond, et al., 2010a; Zeidan, Johnson, Gordon, et al., 2010b)                                                                                                                                                                                                                                                                                 |
| Psychological Detachment                                        | + | 1  | (Hülshager, Feinholdt, & Nübold, 2015)                                                                                                                                                                                                                                                                                                                                                  |
| Questionnaire of Smoking Urges – Negative Affect                | – | 1  | (Adams et al., 2013)                                                                                                                                                                                                                                                                                                                                                                    |
| Repetitive Thoughts Questionnaire – Negative Affect             | – | 1  | (Johnson et al., 2013)                                                                                                                                                                                                                                                                                                                                                                  |
| Self-Beliefs Related to Social Anxiety Scale                    | – | 1  | (Shikatani et al., 2014)                                                                                                                                                                                                                                                                                                                                                                |
| Self-Rating Anxiety Scale                                       | – | 1  | (Chen, Yang, Wang, & Zhang, 2013)                                                                                                                                                                                                                                                                                                                                                       |
| Self-Rating Depression Scale                                    | – | 1  | (Chen et al., 2013)                                                                                                                                                                                                                                                                                                                                                                     |
| Short Mood and Feelings Questionnaire                           | – | 1  | (Liehr & Diaz, 2010)                                                                                                                                                                                                                                                                                                                                                                    |
| STAI – State                                                    | – | 12 | (Ainsworth et al., 2015; Ainsworth et al., 2013; Bonamo, Legerski, & Thomas, 2014; Cruess et al., 2015; Droit-Volet, Fanget, & Dambrun, 2015; Hooper, Davies, Davies, & McHugh, 2011; Johnson et al., 2013; Lee & Orsillo, 2014; Mirams, Poliakoff, Brown, & Lloyd, 2013; McClintock & Anderson, 2013; Zeidan, Johnson, Diamond, et al., 2010a; Zeidan, Johnson, Gordon, et al., 2010b) |
| STAI – Trait                                                    | – | 1  | (Ainsworth et al., 2013)                                                                                                                                                                                                                                                                                                                                                                |
| State Adult Attachment Measure – Anxiety                        | – | 1  | (Pepping et al., 2015)                                                                                                                                                                                                                                                                                                                                                                  |
| State Adult Attachment Measure – Avoidance                      | – | 1  | (Pepping et al., 2015)                                                                                                                                                                                                                                                                                                                                                                  |
| State Adult Attachment Measure – Security                       | – | 1  | (Pepping et al., 2015)                                                                                                                                                                                                                                                                                                                                                                  |
| State Anxiety Inventory for Children                            | – | 1  | (Liehr & Diaz, 2010)                                                                                                                                                                                                                                                                                                                                                                    |

---

<sup>53</sup> studies used modified versions of the PANAS, such as the “International PANAS Short Form” and the “Short PANAS”: Arch & Craske, 2006; Ramsey & Jones, 2015; and Villa & Hilt, 2014.

|                                                                |   |   |                                                                       |
|----------------------------------------------------------------|---|---|-----------------------------------------------------------------------|
| State Rumination                                               | – | 2 | (Hilt & Pollak, 2012; Villa & Hilt, 2014)                             |
| State Social Paranoia Scale                                    | – | 1 | (Ellett et al., 2008 <sup>6</sup> )                                   |
| Stress Arousal Adjective Checklist                             | – | 1 | (Ramsey & Jones, 2015 <sup>7</sup> )                                  |
| Subjective Units of Distress – Anxiety                         | – | 1 | (Ellett et al., 2008)                                                 |
| Subjective Units of Distress – Paranoia                        | – | 1 | (Ellett et al., 2008)                                                 |
| Susceptibility of Embarrassment Scale                          | – | 1 | (Reynolds et al., 2015)                                               |
| Urge Distress                                                  | – | 1 | (Murphy & MacKillop, 2014)                                            |
| VAS – Affect                                                   | – | 1 | (Adams et al., 2013)                                                  |
| VAS – Anxiety                                                  | – | 3 | (Ainsworth et al., 2015; Shikatani et al., 2014; Wahl et al., 2012)   |
| VAS – Body Dissatisfaction                                     | – | 1 | (Adams et al., 2013)                                                  |
| VAS – Distress                                                 | – | 1 | (Cassin & Rector, 2011)                                               |
| VAS – Negative Mood                                            | – | 1 | (Singer & Dobson, 2007)                                               |
| VAS – Sadness                                                  | – | 3 | (Keng, Robins, Smoski, Dagenbach, & Leary, 2013; Sanders & Lam, 2010) |
| VAS – Stress                                                   | – | 2 | (Banks et al., 2015; Creswell et al., 2014)                           |
| VAS – Urge to Neutralize                                       | – | 1 | (Wahl et al., 2012)                                                   |
| Weight- and Body-Related Shame and Guilt Scale – Dutch Version | – | 1 | (Marchiori & Papiés, 2014)                                            |

*Note.* *k*=number of studies; BDI = Beck Depression Inventory; DASS = Depression Anxiety Stress Scale; DDSQ = Dundee Stress State Questionnaire; DES = Differential Emotions Scale; DERS = Difficulties in Emotion Regulation; MPSS = Mood and Physical Symptoms Scale; PANAS-NA = Positive and Negative Affect Scale – Negative Affect Subscale; POMS = Profile of Mood States; STAI = State-Trait Anxiety Inventory; VAS = Visual Analogue Scale

<sup>6</sup>No data reported; an F statistic of 0.01 was assumed, which coded for no effect in our database.

<sup>7</sup>No data reported; an F statistic of 0.01 was assumed, which coded for no effect in our database.

Supplementary Table 2.

*Description of Randomized Controlled Trials Included in the Meta-Analysis.*

| Author                    | Study Aims                                                                                                                                                                       | N  | Participant Population                      | Mindfulness Intervention Description                                                                                                                                                                                             | Control Group Description                                                                     | Negative Affectivity Outcome                                                                         | Effect Estimates (Hedges' g, 95% CI) |
|---------------------------|----------------------------------------------------------------------------------------------------------------------------------------------------------------------------------|----|---------------------------------------------|----------------------------------------------------------------------------------------------------------------------------------------------------------------------------------------------------------------------------------|-----------------------------------------------------------------------------------------------|------------------------------------------------------------------------------------------------------|--------------------------------------|
| Adams et al., 2013        | To test whether mindfulness decreases the influence of body dissatisfaction on negative affect and smoking outcomes                                                              | 64 | Non-clinical female college student smokers | 10-min audio-recorded focused breathing induction followed by 10 min of applying mindfulness while trying on bathing suit (INT 1a) or looking at purse (INT 1b)                                                                  | No training- trying on bathing suit in silence (CT 1a) or looking at purse in silence (CT 1b) | PANAS-NA State; Questionnaire of Smoking Urges - Negative Affect; VAS - Affect, Body Dissatisfaction | 0.141 [-0.35, 0.63]                  |
| Ainsworth et al., 2013    | To compare the effects of 2 types of mindfulness meditation - Focused Attention (FA) and Open-Monitoring (OM) - on alerting, orienting, and executive attention network function | 73 | Non-clinical college students               | INT 1: 3 1-hour group training sessions of guided FA practice and daily at-home 10-min FA practice over 8 days<br>INT 2: 3 1-hour group training sessions of guided OM practice and daily at-home 10-min OM practice over 8 days | Active but not well-matched - 10 min of relaxation at the follow-up session                   | STAI - State, Trait                                                                                  | 0.021 [-0.46, 0.50]                  |
| Ainsworth et al., 2015    | To compare the effects of 2 types of mindfulness meditation (FA and OM) on subjective, autonomic and neuropsychological outcomes                                                 | 32 | Non-clinical community adults               | INT 1: 10-min audio-recorded FA induction<br>INT 2: 10-min audio-recorded OM induction                                                                                                                                           | Active - 10 min of relaxation                                                                 | PANAS-NA State; STAI - State; VAS - Anxiety                                                          | 0.905 [0.14, 1.67]                   |
| Alberts & Thewissen, 2011 | To test the effects of mindfulness on memory for emotional stimuli                                                                                                               | 37 | Non-clinical college students               | 15-min audio-recorded focused breathing induction                                                                                                                                                                                | No training                                                                                   | Brief Mood Inspection Scale, Negative Memory Recall                                                  | .253 [-0.39, 0.89]                   |
| Arch & Craske, 2006       | To test whether mindfulness decreases the intensity and negativity of affectively valenced stimuli and increases                                                                 | 60 | Non-clinical college students               | 15-min audio-recorded focused breathing induction                                                                                                                                                                                | CN 1: Active -15 min of instructed mind-wandering<br>CN 2: Active - 15 min worry              | Affect Scale Negative; PANAS-NA State                                                                | 0.366 [-0.16, 0.90]                  |

|                       |                                                                                                                                          |     |                                      |                                                                                                                                                                                                                                                                                             | induction                                                                                                                                                                                 |                                                                                                                                                                |                      |
|-----------------------|------------------------------------------------------------------------------------------------------------------------------------------|-----|--------------------------------------|---------------------------------------------------------------------------------------------------------------------------------------------------------------------------------------------------------------------------------------------------------------------------------------------|-------------------------------------------------------------------------------------------------------------------------------------------------------------------------------------------|----------------------------------------------------------------------------------------------------------------------------------------------------------------|----------------------|
| Atkinson & Wade, 2012 | willingness to remain in contact with aversive stimuli<br>To test whether mindfulness decreases body dissatisfaction and negative affect | 79  | Non-clinical college students        | 10-min video composed of three parts: an educational component, a 3-min guided experiential exercise encouraging acceptance and awareness, and instructions for using the technique in response to media pressures regarding body image<br>INT 1a: + engagement<br>INT 1b: + non-engagement | No training                                                                                                                                                                               | PANAS-NA State                                                                                                                                                 | 1.374 [0.84, 1.91]   |
| Banks et al., 2015    | To test the effects of mindfulness on working memory and mind wandering                                                                  | 62  | Non-clinical college students        | 2 15-min audio-recorded focused breathing inductions pre/post 7 days of at-home practice (15 min/day at least 4 times/week)                                                                                                                                                                 | Active - 15-min audio-recorded relaxation training sessions (progressive muscle relaxation and body scan exercise) pre/post 7 days of at-home training (15 min/day at least 4 times/week) | Dundee Stress State Questionnaire – Thinking Content, TS (Thinking Style) concentration, TS control/ confidence, TS self-focused; PANAS-NA State; VAS - Stress | -0.147 [-0.64, 0.35] |
| Bonamo et al., 2014   | To test the effects of mindfulness on encoding and long-term recall                                                                      | 167 | Non-clinical female college students | INT 1: 45-min audio-recorded body scan<br>INT 2: 20-min audio-recorded body scan                                                                                                                                                                                                            | No training                                                                                                                                                                               | STAI - State                                                                                                                                                   | -0.307 [-0.65, 0.04] |
| Bowen & Marlatt, 2009 | To test the effects of mindfulness on smoking outcomes                                                                                   | 123 | Non-clinical college student smokers | 11-min mindfulness induction during a smoking cue                                                                                                                                                                                                                                           | Active- 11-min induction with usual coping strategies during a smoking cue                                                                                                                | PANAS-NA State                                                                                                                                                 | 0.142 [-0.21, 0.49]  |

|                       |                                                                                                                      |     |                                               |                                                                                                                                                       |                                                                                                                                   |                                                                                         |                      |
|-----------------------|----------------------------------------------------------------------------------------------------------------------|-----|-----------------------------------------------|-------------------------------------------------------------------------------------------------------------------------------------------------------|-----------------------------------------------------------------------------------------------------------------------------------|-----------------------------------------------------------------------------------------|----------------------|
| Broderick, 2005       | To test whether mindfulness reduces dysphoric mood                                                                   | 177 | Non-clinical college students                 | 8-min audio-recorded focused breathing induction                                                                                                      | CN 1: Active – 8-min reflection on distracting statements<br>CN 2: Active – 8-min reflection on ruminating statements             | PANAS-NA State                                                                          | 0.343 [0.03, 0.66]   |
| Cassin & Rector, 2011 | To test whether mindfulness reduces distress associated with post-event processing (PEP)                             | 57  | Community adults diagnosed with social phobia | 10-min audio-recorded focused breathing induction, followed by a 2-min practice period, then by a 5-min application of mindfulness to a PEP induction | CN 1: No training<br>CN 2: Active - 10-min distraction training followed by a 5-min application of distraction to a PEP induction | PANAS-NA State; VAS - Distress                                                          | 0.537 [-0.02, 1.09]  |
| Cavanagh et al., 2013 | To test whether mindfulness increases trait mindfulness and reduces perceived stress and anxiety/depression symptoms | 58  | Non-clinical college students                 | 14 days of at-home online mindfulness training: audio-recorded 10-min mindfulness exercises to be practiced at least once a day                       | No training                                                                                                                       | Patient Health Questionnaire for Depression and Anxiety (PHQ-4); Perceived Stress Scale | 0.319 [-0.20, 0.84]  |
| Chen et al., 2013     | To test the effects of mindfulness on anxiety and depression symptoms and autonomic nervous system activity          | 60  | Non-clinical nursing students                 | 30-min daily sessions of mindfulness training for 7 days                                                                                              | No training                                                                                                                       | Self-Rating Anxiety Scale; Self-Rating Depression Scale                                 | 0.330 [-0.17, 0.83]  |
| Creswell et al., 2014 | To test whether mindfulness buffers stress reactivity                                                                | 66  | Non-clinical college students                 | 3 consecutive 25-min sessions of audio-recorded mindfulness training (focused breathing) across 3 days                                                | Active - 3 consecutive 25-min sessions of audio-recorded poetry passages and analysis prompts across 3 days                       | PANAS-NA State; VAS - Stress                                                            | -0.004 [-0.48, 0.47] |
| Cropley et al., 2007  | To test the effects of mindfulness on smoking outcomes                                                               | 30  | Non-clinical college student smokers          | 10-min audio-recorded body scan                                                                                                                       | Active - 10-min audio-recorded information about natural history                                                                  | MPSS - Depression, Irritability, Stress, Tension                                        | 0.036 [-0.66, 0.73]  |
| Cruess et             | To test whether                                                                                                      | 120 | Non-clinical                                  | 15-20 min audio-recorded                                                                                                                              | CN 1: Active - 15-                                                                                                                | STAI - State                                                                            | 0.293 [-0.09, 0.67]  |

|                          |                                                                                           |    |                                                                                        |                                                                                                                                                                      |                                                                                       |                                                                                                                                                                                 |                     |
|--------------------------|-------------------------------------------------------------------------------------------|----|----------------------------------------------------------------------------------------|----------------------------------------------------------------------------------------------------------------------------------------------------------------------|---------------------------------------------------------------------------------------|---------------------------------------------------------------------------------------------------------------------------------------------------------------------------------|---------------------|
| al., 2015                | mindfulness reduces subjective distress and buffers physiological stress reactivity       |    | college students                                                                       | mindfulness instructions                                                                                                                                             | 20 min of being read to by the experimenter<br>CN 2: Active – 15-20 min of relaxation |                                                                                                                                                                                 |                     |
| Droit-Volet et al., 2014 | To test the effects of mindfulness on time perception                                     | 42 | Non-clinical college students                                                          | 20 min of audio-recorded mindfulness training: 10-min body-scan and 10-min sitting meditation                                                                        | Active - 20 min of relaxation                                                         | STAI - State                                                                                                                                                                    | 0.389 [-0.21, 0.99] |
| Ellet et al., 2008       | To test the effects of mindfulness on psychotic processes and symptoms                    | 30 | Community adults diagnosed with persecutory delusions (psychosis)                      | 10-min audio-recorded focused breathing exercise                                                                                                                     | Active – 10 min of shopping on a busy street accompanied by research assistant        | Brief Core Schema Scale - Negative Other, Negative Self, Brief Fear of Negative Evaluation Scale; State Social Paranoia Scale; Subjective Units of Distress - Anxiety, Paranoia | 0.672 [-0.05, 1.40] |
| Erisman & Roemer, 2010   | To test the effects of mindfulness on emotional responses to affectively valenced stimuli | 30 | Non-clinical college students with high levels of difficulties in emotional regulation | 10-min audio-recorded mindfulness intervention consisting of information about mindfulness, focused breathing, and how to apply mindfulness to emotional experiences | Active - 10 min of listening to educational information                               | DERS - aware, clarity; DERS – state; PANAS-NA State                                                                                                                             | 0.223 [-0.48, 0.93] |
| Heppner et al., 2008     | To test the effects of mindfulness on social rejection                                    | 57 | Non-clinical college students                                                          | 5-min audio-recorded mindful raisin-eating task                                                                                                                      | CN 1: No training (rejection condition)<br>CN 2: No training (acceptance condition)   | Aggression (Behavioral Measure)                                                                                                                                                 | 0.140 [-0.41, 0.69] |
| Hilt & Pollak,           | To test the effects of mindfulness on                                                     | 96 | Non-clinical young students                                                            | 8-min audio-recorded focused breathing                                                                                                                               | CN 1: Active - 8 min of problem-                                                      | State Rumination                                                                                                                                                                | 0.143 [-0.28, 0.57] |



| Year                      | Topic                                                                                                      | N   | Participant Group                                  | Intervention                                                                                                                                | Control                                                                                                                                       | Outcome Measure                                  | Effect Size [95% CI] |
|---------------------------|------------------------------------------------------------------------------------------------------------|-----|----------------------------------------------------|---------------------------------------------------------------------------------------------------------------------------------------------|-----------------------------------------------------------------------------------------------------------------------------------------------|--------------------------------------------------|----------------------|
| 2012                      | rumination                                                                                                 |     |                                                    | induction                                                                                                                                   | solving                                                                                                                                       |                                                  |                      |
|                           |                                                                                                            |     |                                                    |                                                                                                                                             | CN 2: Active – 8-min audio-recorded distraction induction                                                                                     |                                                  |                      |
| Hong et al., 2012         | To test the effects of mindfulness on willingness to sample and enjoyment of food                          | 411 | Non-clinical college students                      | Audio-recorded mindful raisin-eating task                                                                                                   | CN 1: Active - Audio-recorded information about food storage followed by eating raisins non-mindfully                                         | PANAS-NA State                                   | -0.062 [-0.27, 0.14] |
| Hooper et al., 2011       | To test whether mindfulness reduces spider fear and avoidance                                              | 60  | Non-clinical college students with fear of spiders | 9-min audio-recorded focused breathing induction                                                                                            | CN 2: No training<br>CN 1: Active- 9 min audio-recorded instructions to suppress thoughts<br>CN 2: Active- 9 min of instructed mind-wandering | STAI - State                                     | 0.614 [0.07, 1.16]   |
| Huffziger & Kuehner, 2009 | To test the effects of mindfulness on sad mood                                                             | 76  | Clinically depressed community adults              | 8 min of reading and focusing on mindfulness statements (i.e., prompts to a mindful approach, often incorporating present-moment awareness) | CN 1: Active - 8 min of reflecting on distracting statements<br>CN 2: Active – 8 min of reflecting on ruminating statements                   | PANAS-NA State                                   | 0.272 [-0.21, 0.75]  |
| Hülshager et al., 2013    | To test whether mindfulness reduces emotional exhaustion and increases job satisfaction in a field setting | 64  | Non-clinical employed community adults             | 10-day self-training intervention consisting of daily guided mindfulness meditations and informal mindfulness exercises                     | No training                                                                                                                                   | Emotional Exhaustion (Maslach Burnout Inventory) | 0.179 [-0.33, 0.69]  |
| Hülshager et al., 2015    | To test the effects of mindfulness on work recovery and sleep                                              | 128 | Non-clinical employed community adults             | 10-day self-training intervention consisting of daily guided mindfulness meditations and informal mindfulness exercises                     | No training                                                                                                                                   | Psychological Detachment                         | -0.030 [-0.38, 0.32] |
| Johnson et al., 2015      | To test the effects of mindfulness on mood                                                                 | 92  | Non-clinical college                               | 25-min audio-recorded focused breathing                                                                                                     | CN 1: Active – 25 min of listening to                                                                                                         | POMS - Total Score, Anger,                       | 0.054 [-0.36, 0.47]  |

|                      | (depression, anxiety) and cognition (attention, working memory)                                            |     | students                                                             | induction                                                                                                                                   | a book on tape<br>CN 2: Active – 25 min audio-recorded instructed unguided breathing                                                        | Depression, Tension; Repetitive Thoughts Questionnaire - Negative Affect; STAI - State<br>VAS - Sadness |                      |
|----------------------|------------------------------------------------------------------------------------------------------------|-----|----------------------------------------------------------------------|---------------------------------------------------------------------------------------------------------------------------------------------|---------------------------------------------------------------------------------------------------------------------------------------------|---------------------------------------------------------------------------------------------------------|----------------------|
| Keng et al., 2013    | To test the effects of mindfulness on sad mood and cognition                                               | 100 | Predominantly community adults with non-clinical depression symptoms | 10 min of instructed mindfulness training later followed by 5-min mindfulness induction while making VAS ratings every 30 seconds           | CN 1: No training<br>CN 2: Active - 10 min of reappraisal followed by 5-min reappraisal induction while making VAS ratings every 30 seconds |                                                                                                         | 1.800 [1.26, 2.34]   |
| Kiken & Shook, 2011  | To test whether mindfulness reduces negativity bias                                                        | 175 | Non-clinical college students                                        | 15-min audio-recorded focused breathing induction                                                                                           | Active -15 min of instructed mind wandering                                                                                                 | Future Events Scale - Pessimism; PANAS-NA State                                                         | 0.015 [-0.28, 0.31]  |
| Kuehner et al., 2009 | To test the effects of mindfulness on mood and dysfunctional attitudes                                     | 60  | Non-clinical college students                                        | 8 min of reading and focusing on mindfulness statements (i.e., prompts to a mindful approach, often incorporating present-moment awareness) | CN 1: Active - 8 min of rumination<br>CN 2: Active – 8 min of focusing attention on external thoughts                                       | Dysfunctional Attitudes Scale; PANAS-NA State                                                           | 0.267 [-0.27, 0.80]  |
| Laurent et al., 2014 | To test the effects of mindfulness on romantic couples' physiological responses to conflict-induced stress | 204 | Non-clinical college student heterosexual couples                    | 10-min audio-recorded mindfulness intervention consisting of information about mindfulness and how to apply it to emotional experiences     | CN 1: Active - 10-min audio-recorded perspective-taking exercise<br>CN 2: Active -10 min of thinking about a stressful situation            | PANAS-NA State                                                                                          | -0.117 [-0.41, 0.18] |
| Lee & Orsillo, 2014  | To test the effects of mindfulness on cognitive flexibility                                                | 42  | Predominantly community adults diagnosed with                        | 20-min audio-recorded focused breathing induction later followed by a 3-min re-induction prior                                              | CN 1: Active - 20 min of music<br>CN 2: Active - 20 min of instructed                                                                       | STAI - State                                                                                            | 0.563 [-0.08, 1.20]  |

|                          |                                                                                             |     |                                           |                                                                                                                                                                                                                                                       |                                                                                                                                                                                                                                                                        |                                                                                     |                      |
|--------------------------|---------------------------------------------------------------------------------------------|-----|-------------------------------------------|-------------------------------------------------------------------------------------------------------------------------------------------------------------------------------------------------------------------------------------------------------|------------------------------------------------------------------------------------------------------------------------------------------------------------------------------------------------------------------------------------------------------------------------|-------------------------------------------------------------------------------------|----------------------|
|                          |                                                                                             |     | Generalized Anxiety Disorder              | to the cognitive task                                                                                                                                                                                                                                 | mind-wandering                                                                                                                                                                                                                                                         |                                                                                     |                      |
| Liehr & Diaz, 2010       | To test the effects of mindfulness on depression and anxiety                                | 17  | Non-clinical children that are minorities | 10 15-min mindfulness sessions over 14 days taught by experienced meditation instructor in school setting                                                                                                                                             | Active - 10 15-min health education classes over 14 days taught by health teacher in school setting                                                                                                                                                                    | Short Mood and Feelings Questionnaire; State Anxiety Inventory for Children         | 0.697 [-0.24, 1.63]  |
| Liu et al., 2012         | To test the effects of mindfulness on pain outcomes                                         | 60  | Non-clinical female college students      | 5 min of psycho-education on mindfulness followed by 10 min of mindfulness training                                                                                                                                                                   | CN 1: Active - 5 min psycho-education followed by 10-min distraction exercise<br>CN 2: Active -15 min of music                                                                                                                                                         | Pain Distress                                                                       | 0.524 [-0.02, 1.07]  |
| Long & Christian, 2015   | To test the effects of mindfulness on relationship between injustice and retaliation        | 109 | Non-clinical college students             | 12-min audio-recorded focused breathing induction<br>INT 1a: + fairness<br>INT 1b: + injustice                                                                                                                                                        | Active -12 min of instructed mind-wandering<br>CT 1a: fairness<br>CT 1b: injustice                                                                                                                                                                                     | Anger Rumination Scale                                                              | 0.305 [-0.08, 0.69]  |
| Luethcke et al., 2011    | To test the effects of mindfulness on mirror exposure (ME) and eating disorder risk factors | 168 | Non-clinical female college students      | 2 sessions over 7 days: 1) Focused breathing induction prior to baseline ME task on day 1; 2) focused breathing induction before the second ME on day 7<br>In between the 2 sessions was homework to practice mindfulness during an everyday activity | CN 1: Active but not well-matched - instructions for ME task were specific to the cognitive dissonance strategy<br>CN 2: Active but not well-matched - instructions for ME task were specific to the non-judgment strategy<br>Neither CN included pre-ME practice time | BDI II; Body Image Avoidance Questionnaire; EDE-Q Shape and Weight Concern Subscale | -0.055 [-0.37, 0.26] |
| Marchiori & Papies, 2013 | To test the effects of mindfulness on eating habits (portion size,                          | 110 | Non-clinical college students             | 14-min audio-recorded body scan                                                                                                                                                                                                                       | Active - 14 min of listening to a book on tape                                                                                                                                                                                                                         | Irritability; Weight- and Body-Related                                              | 0.032 [-0.34, 0.40]  |

|                             | overeating when hungry)                                                                           |    |                                                                        |                                                                                                                              |                                                                                                                                                                                        | Shame and Guilt Scale (Dutch Version)               |                      |
|-----------------------------|---------------------------------------------------------------------------------------------------|----|------------------------------------------------------------------------|------------------------------------------------------------------------------------------------------------------------------|----------------------------------------------------------------------------------------------------------------------------------------------------------------------------------------|-----------------------------------------------------|----------------------|
| McClintock & Anderson, 2013 | To test the effects of mindfulness on interpersonal dependency and dependency-associated distress | 70 | Non-clinical college students with high-trait interpersonal dependency | 20 min audio-recorded focused breathing induction                                                                            | Active - 20 min audio-recorded instructions to focus on specific ideas                                                                                                                 | PANAS-NA State; STAI - State                        | 0.561 [0.09, 1.04]   |
| Mirams et al., 2013         | To test the effects of mindfulness on somatic perception                                          | 62 | Non-clinical college students                                          | 2 in-lab sessions separated by 8 15-min audio-recorded body scan exercises over the course of 7 days practiced at home daily | Active - 8 15-min audio-recorded consecutive clips of a book on tape over the course of 7 days                                                                                         | Patient Health Questionnaire (PHQ-15); STAI - State | 0 [-0.49, 0.49]      |
| Murphy & MacKillop, 2014    | To test the effects of mindfulness on alcohol cravings                                            | 84 | Community adults that are clinically at-risk heavy drinkers            | 10-min audio-recorded body scan followed by a 45-min alcohol cue induction to which mindfulness was applied                  | CN 1: Active- 10-min distraction induction<br>CN 2: Active but not well-matched - 10 min of usual coping skills<br>Both followed by applying strategy to a 45-min alcohol cue exposure | Negative Affect (Affect Circumplex); Urge Distress  | -0.252 [-0.71, 0.20] |
| Nosen & Woody, 2013a        | To test the effects of mindfulness on smoking cravings                                            | 84 | Non-clinical community adult smokers tested 1 day prior to quitting    | 60-90 min mindfulness psycho-education tailored to smoking cravings                                                          | CN 1: Active - 60-90 min of filler questionnaires<br>CN 2: Active - psycho-education                                                                                                   | DASS-21                                             | 0.023 [-0.42, 0.47]  |
| Nosen & Woody, 2013b        |                                                                                                   | 88 | Non-clinical community adult smokers tested 8 days prior to quitting   |                                                                                                                              |                                                                                                                                                                                        |                                                     | 0.022 [-0.41, 0.45]  |
| Ortner & Zelazo,            | To test whether mindfulness reduces                                                               | 52 | Non-clinical college                                                   | 10-min audio-recorded focused breathing                                                                                      | CN 1: Active- 10 min audio-recorded                                                                                                                                                    | Anger; Linguistic                                   | 0.005 [-0.56, 0.57]  |

|                         |                                                                                    |     |                                             |                                                                                                                                                                 |                                                                                                                                                                                    |                                                                  |                      |
|-------------------------|------------------------------------------------------------------------------------|-----|---------------------------------------------|-----------------------------------------------------------------------------------------------------------------------------------------------------------------|------------------------------------------------------------------------------------------------------------------------------------------------------------------------------------|------------------------------------------------------------------|----------------------|
| 2014                    | conflict-related negative affect and anger                                         |     | students                                    | induction                                                                                                                                                       | guided imagery exercise<br>CN 2: No training                                                                                                                                       | Inquiry and Word Count - anger, negative emotion; PANAS-NA Trait |                      |
| Pepping et al., 2015    | To test the effects of mindfulness on attachment security                          | 86  | Non-clinical college students               | 15-min mindfulness induction read aloud to participant by experimenter; participants completed 1 of 4 types: mindfulness of breath, thoughts, emotions, or body | Active - 15 min of either reading a story about nature, reflecting on listening skills, assertion, or use of questions in a conversation (collapsed as one condition for analysis) | State Adult Attachment Measure - Anxiety, Avoidance, Security    | 0.014 [-0.41, 0.43]  |
| Prins et al., 2014      | To test the effects of mindfulness on pain perception                              | 46  | Non-clinical college students               | 10-min mindfulness induction during a pain induction                                                                                                            | Active - 10 min of listening to stories during a pain induction                                                                                                                    | Pain Experience Questionnaire - Affective Pain, General Anxiety  | -0.088 [-0.66, 0.48] |
| Ramos Diaz et al., 2014 | To test the effects of mindfulness on coping with memory of acute stressors        | 76  | Non-clinical female college students        | 10-min interview with experimenter who administered mindful instructions while participant describes feelings about acute stressor                              | CN 1: Active - 10 min of talking about stressful feelings with experimenter<br>CN 2: Active - 10 min of thinking about a stressful situation                                       | Impact of Events Scale; PANAS-NA State                           | -0.032 [-0.50, 0.44] |
| Ramsey & Jones, 2015    | To test whether mindfulness reduces behavioral engagement in ostracism             | 100 | Non-clinical college students               | 5 min audio-recorded mindful raisin-eating exercise                                                                                                             | Active - 5 min of reading and typing                                                                                                                                               | PANAS-NA State; Stress Arousal Adjective Checklist               | 0.020 [-0.37, 0.41]  |
| Reynolds et al., 2015   | To test whether mindfulness affects the relationship between disgust and avoidance | 101 | Predominantly non-clinical college students | 10-min audio-recorded mindfulness induction consisting of information about mindfulness and                                                                     | Active -10-min public service audio-recording from national radio                                                                                                                  | Differential Emotions Scale - anger, contempt,                   | 0.050 [-0.34, 0.44]  |

|                         |                                                                                     |    |                                                                     | emotion management, a focused breathing exercise, and another mindfulness exercise                                                                              |                                                                                                                                                    | disgust, fear, guilt, sad, shame; Susceptibility of Embarrassment Scale |                      |
|-------------------------|-------------------------------------------------------------------------------------|----|---------------------------------------------------------------------|-----------------------------------------------------------------------------------------------------------------------------------------------------------------|----------------------------------------------------------------------------------------------------------------------------------------------------|-------------------------------------------------------------------------|----------------------|
| Rogojanski et al., 2011 | To test the effects of mindfulness on coping with smoking cravings                  | 61 | Non-clinical community adult smokers                                | 20 min of audio-recorded mindfulness instructions during a smoking cue exposure                                                                                 | Active - 20 min of audio-recorded instructions to suppress thoughts during a smoking cue exposure                                                  | DASS-21; PANAS-NA State                                                 | 0.638 [0.13, 1.15]   |
| Sanders & Lam, 2010a    | To test the effects of mindfulness on affect and problem solving in social settings | 30 | Community adults recovering from clinical depression                | 8-min PowerPoint presentation in which mindfulness is applied via focusing attention on each item from a list of 28 symptom-focused items related to rumination | Active - 8-min PowerPoint presentation in which participants thought about each item from a list of 28 symptom-focused items related to rumination | VAS - Sadness                                                           | -0.205 [-0.90, 0.49] |
| Sanders & Lam, 2010b    |                                                                                     | 30 | Non-clinical never-depressed community adults                       |                                                                                                                                                                 |                                                                                                                                                    |                                                                         | 0.205 [-0.49, 0.90]  |
| Sauer & Baer, 2012      | To test the effects of mindfulness on behavioral distress tolerance                 | 40 | Predominantly community adults with Borderline Personality Disorder | 8 min of mindful self-focus on mindful statements                                                                                                               | Active - 8 min of reading ruminative statements                                                                                                    | Distress Tolerance (Behavioral Measure); PANAS-X Anger                  | 0.99 [0.34, 1.64]    |

|                        |                                                                                                          |    |                                                |                                                                                                                                                                                                                                                                                    |                                                                                                                                                                                                                                                               |                                                                                                                                 |                     |
|------------------------|----------------------------------------------------------------------------------------------------------|----|------------------------------------------------|------------------------------------------------------------------------------------------------------------------------------------------------------------------------------------------------------------------------------------------------------------------------------------|---------------------------------------------------------------------------------------------------------------------------------------------------------------------------------------------------------------------------------------------------------------|---------------------------------------------------------------------------------------------------------------------------------|---------------------|
| Shikatani et al., 2014 | To test the effects of mindfulness on post-event processing (PEP) and recruitment of cognitive processes | 56 | Community adults diagnosed with social anxiety | 40-min session consisting of 1) learning about the acceptance and awareness components of mindfulness and 2) an audio-recorded mindfulness induction: 3-min focused breathing exercise followed by 3 7-min mindfulness exercises about noticing thoughts and emotions about speech | CN 1: Active - 40-min of anxiety psycho-education<br>CN 2: Active but not well-matched - 20 min spent thinking about pre-induction speech performance                                                                                                         | Average PEP-Degree, Distress; PANAS-NA State; PEP-Degree, Distress; Self-Beliefs Related to Social Anxiety Scale; VAS - Anxiety | 0.171 [-0.38, 0.72] |
| Singer & Dobson, 2007  | To test the effects of mindfulness on depression relapse prevention                                      | 80 | Clinically depressed community adults          | 10-min mindfulness induction with verbally read instructions encouraging present-moment awareness and acceptance of thoughts and feelings                                                                                                                                          | CN 1: No training<br>CN 2: Active- 10 min of rumination<br>CN 3: Active -10 min of focusing on and visualizing unrelated mental images                                                                                                                        | Attitude Towards Negative Experiences Scale - Negative Attitudes Towards Negative Experiences; VAS - Negative Mood              | 0.616 [0.10, 1.14]  |
| Ussher et al., 2009    | To test the effects of mindfulness on smoking cravings and withdrawal symptoms                           | 48 | Non-clinical community adult smokers           | 2 sessions of a 10-min audio-recorded body scan (in-lab and outside-lab within same day)                                                                                                                                                                                           | CN 1: Active –2 sessions (in-lab and outside-lab within same day) of a 10-min audio-recording of natural history readings<br>CN 2: Active – 2 sessions (in-lab and outside-lab within same day) of 10-min audio-recorded instructions for isometric exercises | Mood and Physical Symptoms Scale (MPSS) - Irritability, Stress, Tension                                                         | 0.216 [-0.37, 0.80] |

|                           |                                                                            |     |                                                               |                                                                                                                                                     |                                                                                                                                                                                     |                                                   |                      |
|---------------------------|----------------------------------------------------------------------------|-----|---------------------------------------------------------------|-----------------------------------------------------------------------------------------------------------------------------------------------------|-------------------------------------------------------------------------------------------------------------------------------------------------------------------------------------|---------------------------------------------------|----------------------|
| Verplanken & Fisher, 2014 | To test whether mindfulness reduces worrying                               | 103 | Non-clinical college students                                 | 20-min audio-recorded focused breathing induction                                                                                                   | Active - 20-min audio-recording of a travel documentary                                                                                                                             | PANAS-NA State                                    | 0.149 [-0.24, 0.53]  |
| Villa & Hilt, 2014        | To test whether mindfulness reduces rumination and negative affect         | 111 | Non-clinical college students                                 | 8-min audio-recorded focused breathing induction                                                                                                    | CN 1: No training<br>CN 2: Active - 8 min of relaxation                                                                                                                             | PANAS-NA State; State Rumination                  | -0.020 [-0.42, 0.38] |
| Vinci et al., 2014        | To test the effects of mindfulness on negative affect and alcohol cravings | 207 | College students clinically at-risk for heavy drinking        | 10-min audio-recorded focused breathing induction INT 1a: + negative stimuli<br>INT 1b: + neutral stimuli                                           | CN 1: Active - 10 min of relaxation<br>CN 2: Active - 10 min of word puzzles                                                                                                        | PANAS-NA State                                    | 0.002 [-0.29, 0.30]  |
| Wahl et al., 2012         | To test the effects of mindfulness on obsessive/intrusive thoughts         | 30  | Community adults diagnosed with Obsessive-Compulsive Disorder | 6-min mindfulness induction adapted from the module 'Thoughts are not facts' used in MBCT (Segal et al. 2002) while experiencing intrusive thoughts | Active - 6-min distraction induction while experiencing intrusive thoughts                                                                                                          | VAS - Anxiety, VAS - Urge to Neutralize           | 0.764 [0.04, 1.49]   |
| Watford & Stafford, 2015  | To test whether mindfulness improves emotion regulation outcomes           | 70  | Non-clinical college students                                 | 15-min audio-guided focused breathing induction                                                                                                     | Active - 15 min of listening to the radio                                                                                                                                           | DERS - aware, clarity; DERS-state; PANAS-NA State | 0.003 [-0.46, 0.47]  |
| Wells & Roussis, 2014     | To test the effects of mindfulness on intrusive thoughts and images        | 56  | Non-clinical college students                                 | 5-min mindfulness exercise encouraging detachment, awareness, and acceptance of any intrusive images/thoughts                                       | CN 1: Active and well-matched - 5 min of accepting intrusive thoughts<br>CN 2: Active and well-matched - 5 min of imagining and visualizing intrusive thoughts<br>CN 3: No training | Intrusive Thoughts                                | 0.545 [-0.06, 1.15]  |
| Yusainy & Lawrence, 2015  | To test the effects of mindfulness on aggression                           | 110 | Non-clinical college students                                 | 15-min audio-recorded focused breathing induction                                                                                                   | Active - 15 min of listening to educational information and playing scrabble                                                                                                        | PANAS-NA State                                    | -0.163 [-0.54, 0.21] |
| Zabelina et               | To test the effects of                                                     | 81  | Non-clinical                                                  | 10-min audio-recorded                                                                                                                               | Active - 10 min of                                                                                                                                                                  | Goldberg Scale                                    | 0.022 [-0.41, 0.45]  |



|                                                     |                                                                                                                                             |    |                               |                                                                                                   |                                                                                                                                                 |                                                                                                                 |                     |
|-----------------------------------------------------|---------------------------------------------------------------------------------------------------------------------------------------------|----|-------------------------------|---------------------------------------------------------------------------------------------------|-------------------------------------------------------------------------------------------------------------------------------------------------|-----------------------------------------------------------------------------------------------------------------|---------------------|
| al., 2011                                           | mindfulness on trait variables (creativity, neuroticism, and mindfulness)                                                                   |    | college students              | focused breathing induction                                                                       | listening to educational information                                                                                                            | for Neuroticism                                                                                                 |                     |
| Zeidan, Johnson, Diamond, David, & Goolkasian, 2010 | To test the effects of mindfulness on mood and cognitive variables (sustained attention, verbal fluency, visual coding, and working memory) | 49 | Non-clinical college students | 4 20-min sessions of mindfulness training (focused breathing) taught by an instructor over 4 days | Active - 4 20-min sessions of listening to a book on tape while being monitored by an experimenter over 4 days                                  | Center for Epidemiologic Studies Depression Scale; POMS - Total Score, Anger, Depression, Tension; STAI - State | 0.183 [-0.37, 0.74] |
| Zeidan, Johnson, Gordon, & Goolkasian, 2010         | To test the effects of mindfulness on mood and cardiovascular variables                                                                     | 82 | Non-clinical college students | 3 20-min focused breathing inductions over 3 days                                                 | CN 1: Active - 3 20-min sham meditation sessions over 3 days<br>CN 2: Active – 3 20-min sessions over 3 days of talking with other participants | POMS - Total Score, Anger, Depression, Tension; STAI - State                                                    | 0.727 [0.26, 1.19]  |

*Note.* N=total participants; 95% CI=95% confidence interval around mean estimate; INT=Intervention; CN=Control; min=minutes; BDI = Beck Depression Inventory; CI = Confidence Interval; DASS = Depression Anxiety Stress Scale; DERS = Difficulties in Emotion Regulation; MPSS = Mood and Physical Symptoms Scale; PANAS-NA = Positive and Negative Affect Scale – Negative Affect Subscale; POMS = Profile of Mood States; STAI = State-Trait Anxiety Inventory; VAS = Visual Analogue Scale.
